# Supplementary material for: Silica Particles Trigger the Exopolysaccharide Production of Harsh Environment Isolates of Growth-Promoting Rhizobacteria and Increase Their Ability to Enhance Wheat Biomass in Drought-Stressed Soils
Source: MDPI journal article supplement (doi:10.3390/ijms22126201), 2021-06-08
Supplement: s1 [file s1]

## Supplementary Materials

### Silica Particles Trigger the Exopolysaccharide Production of Harsh Environment Isolates of Growth-Promoting Rhizobacteria and Increase Their Ability to Enhance Wheat Biomass in Drought-Stressed Soils

Anastasiia Fetsiukh <sup>1</sup>, Julian Conrad <sup>2</sup>, Jonas Bergquist <sup>3</sup>, and Salme Timmusk <sup>1,4,\*</sup>

<sup>1</sup> Department of Forest Mycology and Plant Pathology, Swedish University of Agricultural Sciences (SLU) Uppsala, PO 7026, SE 75007, Sweden; stimusk@hotmail.com

<sup>2</sup> Swedish National Cryo-EM Facility, Science for Life Laboratory, Sweden PO 1031, SE 171 21 Sweden; julian.conrad@scilifelab.se

<sup>3</sup> Department of Chemistry, Uppsala University, PO 576, SE 75123 Sweden; jonas.bergquist@kemi.se

<sup>4</sup> Bashan Institute of Science, 1730 Post Oak Ct, Auburn, AL 36830, USA

\* Correspondence: salme.timmusk@slu.se

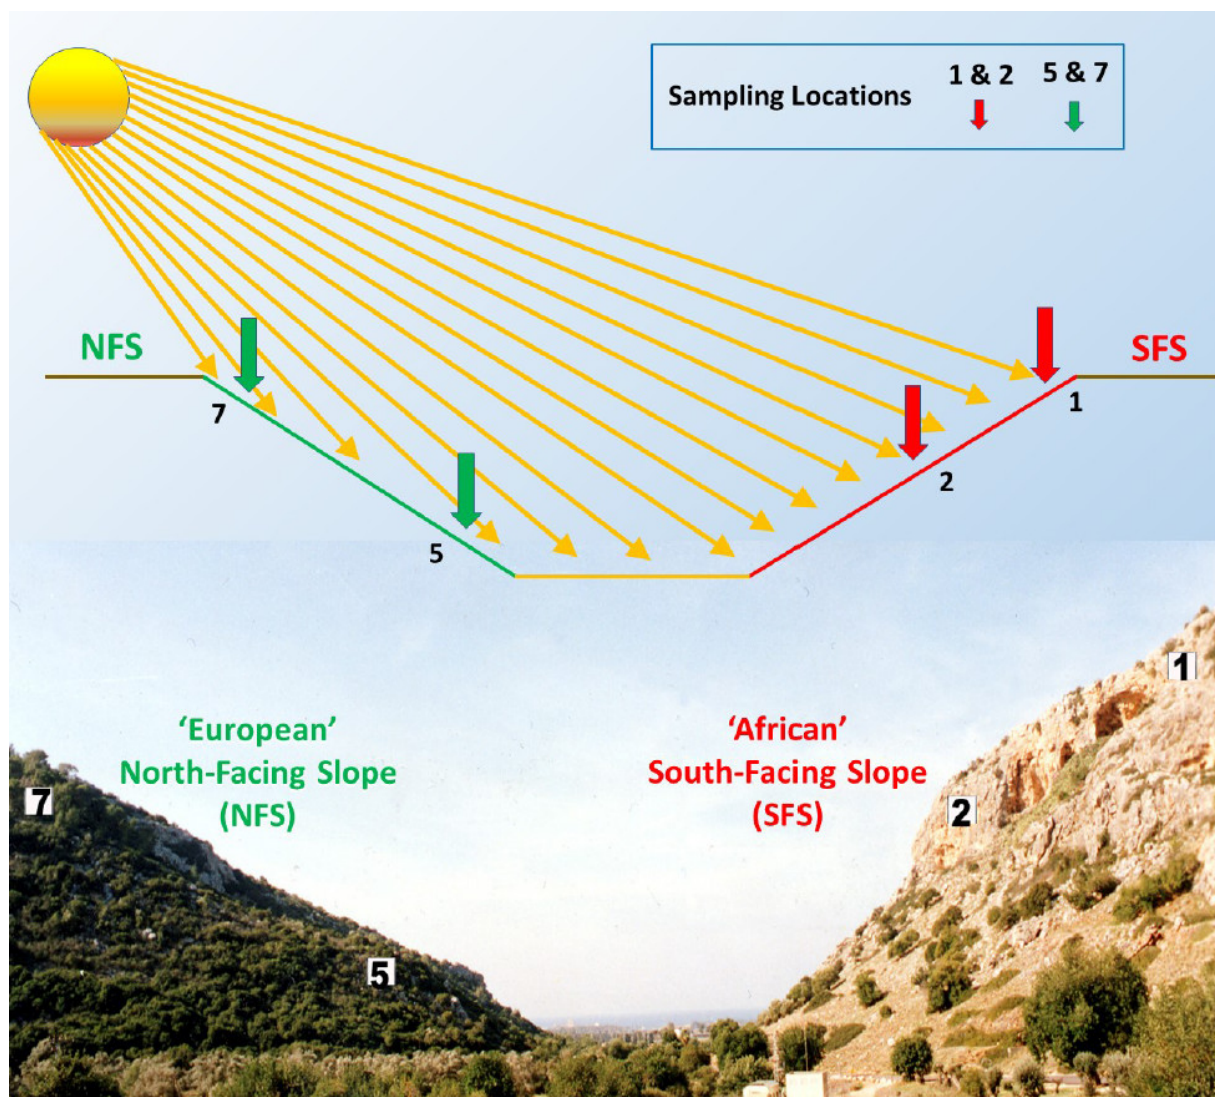

**Figure S1.** The Evolution Canyon (EC) model: Schematic diagram of the Evolution Canyon at Lower Nahal Oren, Mount Carmel (source<sup>10</sup>: Nevo, 2012 Evolution Canyon," a potential

microscale monitor of global warming across life, PNAS 109; 8) (Photo by S. Timmusk).

**Table S1. Strains used in the study**

| Name                                 | Wild barley rhizosphere, the Evolution Canyon, Haifa, Israel | Publications |
|--------------------------------------|--------------------------------------------------------------|--------------|
| <i>Paenibacillus polymyxa</i> A26    | Wild barley rhizosphere, the Evolution Canyon, Haifa, Israel | [1]          |
| <i>Paenibacillus polymyxa</i> A26Sfp | Wild barley rhizosphere, the Evolution Canyon, Haifa, Israel | [2–4]        |

## Video S1

A. Material Typical performance of A26 and A26Sfp; B. A26SN and A26SfpSN. See Material and Methods.

## Reference

1. Timmusk, S.; Paalme, V.; Pavlicek, T.; Bergquist, J.; Vangala, A.; Danilas, T.; Nevo, E. Bacterial distribution in the rhizosphere of wild barley under contrasting microclimates. *PLoS One*. **2011**, *6*, 1–8, doi: 10.1371/journal.pone.0017968.
2. Timmusk, S.; Kim, S.-B.; Nevo, E.; Abd El Daim, I.; Ek, B.; Bergquist, J.; Behers, L. Sfp-type PPTase inactivation promotes bacterial biofilm formation and ability to enhance wheat drought tolerance. *Front. microbiol.* **2015**, *6*, 387, doi: 10.3389/fmicb.2015.00387.
3. Abd El-Daim, I.; Haggblom, P.; Karlsson, M.; Stenstrom, E.; Timmusk, S. *Paenibacillus polymyxa* A26 Sfp-type PPTase inactivation limits bacterial antagonism against *Fusarium graminearum* but not of *F. culmorum* in kernel assay. *Front. Plant Sci.* **2015**, *6*, 368. doi: 10.3389/fpls.2015.00368.
4. Kim, S.-B.; Timmusk, S. A simplified method for *Paenibacillus polymyxa* gene knockout and insertional screening. *PLoS One* **2013**, *8*, e68092. doi: 10.1371/journal.pone.0068092.
